1 **Chemical convergence in a guild of facultative myrmecophilous caterpillars and**  
2 **host plants**

3  
4 Chemical convergence in caterpillars

5  
6 LUAN DIAS LIMA<sup>1</sup>, JOSÉ ROBERTO TRIGO<sup>2,†</sup>, and LUCAS AUGUSTO

7 KAMINSKI<sup>1,\*</sup>

8  
9 <sup>1</sup> Programa de Pós-Graduação em Biologia Animal, Departamento de Zoologia,  
10 Universidade Federal do Rio Grande do Sul, CEP 91501-970, Porto Alegre, Rio Grande  
11 do Sul, Brazil. ORCiDs: LDL: 0000-0001-5414-3427; LAK: 0000-0002-6468-0960. +55  
12 (51) 3308-7702 ; \*Corresponding author: E-mail: [lucaskaminski@yahoo.com.br](mailto:lucaskaminski@yahoo.com.br)

13 <sup>2</sup> Departamento de Biologia Animal, Instituto de Biologia, Universidade Estadual de  
14 Campinas, CEP 13083-970, Campinas, São Paulo, Brazil. ORCID: 0000-0003-3028-  
15 5353. † Author deceased November 28<sup>th</sup> 2017

16  
17 **Abstract.** 1. Ants are a strong selective pressure on herbivorous insects, however, some  
18 caterpillars live in symbiosis with them using chemical defensive strategies.

19 2. We aimed to investigate the adaptive resemblance between cuticular hydrocarbons  
20 (CHCs) in multitrophic systems involving a guild of facultative myrmecophilous  
21 caterpillar species (Lepidoptera: Lycaenidae), tending ants (Hymenoptera: Formicidae)  
22 and host plants from three families. Our study hypothesis was that the caterpillars' CHCs  
23 would resemble their host plants (chemical camouflage).

24 3. We analyzed the CHCs using gas chromatography/mass spectrometry. The Morisita's  
25 similarity index (SI) of CHC profiles were compared between caterpillar species with  
26 different types of ant association (commensal or mutualistic), ants and host plants.

27 4. We found strong convergence between caterpillars' CHCs and plants, especially in  
28 commensal species that do not provide secretion rewards for ants. Moreover, we found  
29 unexpected chemical convergence between mutualistic caterpillar species that offer  
30 nectar reward secretions.

31 5. These results show that caterpillars acquire CHCs through diet that vary according to  
32 the host plant species and type of ant association (commensalism or mutualism). The  
33 'chemical camouflage' in myrmecophilous caterpillars may have arisen as a defensive  
34 strategy allowing coexistence with ants on plants, whereas 'chemical conspicuity' may  
35 evolve in the context of honest signaling between true mutualistic partners.

36 6. We suggest the existence of both chemical Müllerian and Batesian mimicry rings  
37 between myrmecophilous caterpillars. In multimodal systems, the cuticular chemical  
38 blends can play a key adaptive role to decrease ant attacks and increase caterpillars'  
39 survival.

40

41 **Key words.** Ant-plant-herbivore interactions, chemical camouflage, chemical crypsis,

42 chemical phytomimesis, chemical strategy, symbiosis.

43 **Graphical abstract**

- 44 • Chemical camouflage can be a defensive strategy against ants in myrmecophilous  
45 caterpillars.
- 46 • The ‘chemical conspicuity’ is proposed as a new strategy mediated by cuticular  
47 hydrocarbons in myrmecophilous caterpillars.
- 48 • Chemical mimicry rings between myrmecophilous caterpillars may occur,  
49 specially between mutualistic species that produce nectar rewards for ants.

**Myrmecophilous caterpillars from the ant’s chemical perspective**

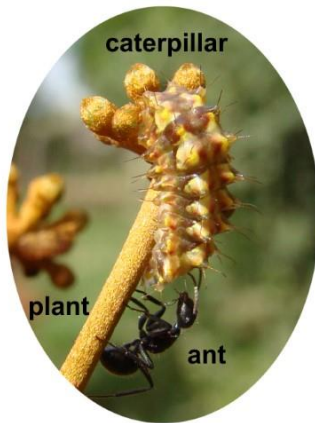

50 Multitrophic system

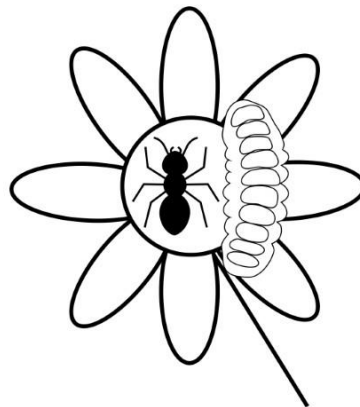

Chemical camouflage

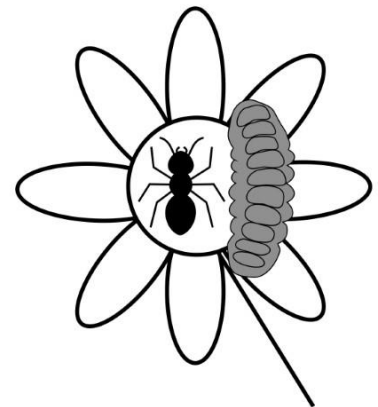

Chemical conspicuity

## 51 **Introduction**

52 Herbivorous insects suffer a top-down effect by predators and parasitoids (Vidal &  
53 Murphy, 2018). Strategies that minimize the detection or the attack after detection as well  
54 as deceive these natural enemies will be positively selected and spread within herbivorous  
55 insects (see Ruxton *et al.*, 2004). Among the top predators in terrestrial ecosystems, ants  
56 patrolling foliage are considered a strong selective pressure on these insects (Floren *et al.*,  
57 2002). However, some myrmecophilous herbivores such as hemipterans (e.g. aphids,  
58 scales, coccids, whiteflies, leafhoppers, and treehoppers), lepidopteran caterpillars  
59 (Lycaenidae and Riodinidae), and galls (induced by aphids and cynipid wasps) can release  
60 liquid rewards rich in sugar (honeydew) which attract tending ants (see Pierce *et al.*, 2002;  
61 Pierce, 2019; Pringle, 2020). This relationship is named trophobiosis, a symbiotic  
62 relationship between ants and the trophobiont insects that they attend (Gibernau &  
63 Dejean, 2001). The attraction of tending ants can protect the trophobiont herbivores  
64 against predators and parasitoids as a conditional mutualism since the ants patrolling  
65 foliage behave aggressively against any foreign arthropod (see Rico-Gray & Oliveira,  
66 2007 and references therein for examples with hemipterans).

67 The trophobiotic interaction is particularly interesting in lycaenid and riodinid  
68 caterpillars. They do not excrete the excess of the rich sugar phloem as honeydew-  
69 producing hemipterans do, they produce costly secretion rewards through specialized  
70 glands (Daniels *et al.*, 2005; Kaminski & Rodrigues, 2011). This secretion in lycaenid  
71 caterpillars has been reported to manipulate behavior of tending ants (Hojo *et al.*, 2015).  
72 Furthermore, myrmecophilous caterpillars possess behavioral traits and sets of  
73 specialized ‘ant-organs’ used for chemical and acoustic communication with tending ants  
74 (Malicky, 1970; DeVries, 1990; Fiedler *et al.*, 1996; Casacci *et al.*, 2019). However, a  
75 question remains: would be the nutritional reward sufficient to deter the ant aggressive

76 behavior in trophobiont caterpillars, or did additional defensive mechanisms evolve to  
77 avoid predation? Several studies showed that tending ants may prey upon honeydew-  
78 producing aphids (e.g. Sakata *et al.*, 1995; Fischer *et al.*, 2001). Thus, one alternative  
79 strategy can be the ‘chemical camouflage’ (sensu von Beeren *et al.*, 2012) which occurs  
80 when an operator does not detect an emitter as its chemical cues blend with the  
81 environment and no reaction is caused in the operator. This strategy is found in the  
82 myrmecophilous treehopper *Guayaquila xiphias* (Fabricius, 1803) (Hemiptera:  
83 Membracidae) due to the high similarity of cuticular hydrocarbons (CHCs) of its host  
84 plant, *Schefflera vinosa* (Cham. & Schldl.) Frodin & Fiaschi (Araliaceae) and seems to  
85 solve the dilemma of attracting aggressive tending ants, since these predators did not  
86 recognize the hemipteran as prey (Silveira *et al.*, 2010). Following this approach, we  
87 aimed to investigate the adaptive resemblance between CHC profiles in three multitrophic  
88 systems involving a guild of facultative myrmecophilous caterpillars, tending ants and  
89 host plant species (Fig. 1). These caterpillars are polyphagous and have polychromatism  
90 color pattern associated with visual camouflage (see Monteiro, 1991). Thus, our  
91 hypothesis was that the caterpillars would have CHC profiles that resemble their host  
92 plants, suggesting chemical camouflage as an additional defensive mechanism against  
93 aggressive tending ants.

94

## 95 **Materials and methods**

### 96 *Study Site and Organisms*

97 Collections were carried out in two areas of Cerrado savanna in São Paulo state,  
98 southeastern Brazil a small fragment belonging to the Laboratório Nacional de Luz  
99 Síncrotron in Campinas (22°48’S, 47°03’W), and a reserve of the Estação Experimental  
100 de Mogi-Guaçu, Mogi Guaçu (22°18’S, 47°10’W). In both sites, the vegetation consists

101 of a dense scrubland of shrubs and trees, classified as cerrado sensu stricto (Oliveira-Filho  
102 & Ratter, 2002). The collection and transport of the specimens were authorized by the  
103 Biodiversity Authorization and Information System (SISBIO) by the license No. 62345-  
104 1.

105 Neotropical lycaenid butterflies are included in three subfamilies, with the tribe  
106 Eumaeini being the most diverse (Robbins, 2004). In general, Eumaeini caterpillars are  
107 polyphagous and feed on reproductive tissue (buds and flowers) of host plants (see  
108 Robbins & Aiello, 1982; Kaminski *et al.*, 2012; Silva *et al.*, 2014). Caterpillars of known  
109 Eumaeini are engaged in low degree of facultative interactions with tending ants and  
110 several species seem to have lost myrmecophily (Fiedler, 1991; LAK, unpublished data).

111 We collected Eumaeini immatures (eggs and caterpillars) on three host plant species that  
112 are commonly used by these caterpillars in the study site (see Kaminski & Freitas, 2010;  
113 Kaminski *et al.*, 2010b, 2012; Rodrigues *et al.*, 2010): *Byrsonima intermedia* A. Juss.  
114 (Malpighiaceae), *Pyrostegia venusta* (Ker-Gawl.) Miers (Bignoniaceae) and *S. vinosa*  
115 (Araliaceae). On the inflorescences of these plants we collected six lycaenid species:

116 1) *Allosmaitia strophius* (Godart, [1824]) – oligophagous caterpillar specialized on  
117 inflorescences of Malpighiaceae (Kaminski & Freitas, 2010). Although the females prefer  
118 to oviposit on plants with ants (Bächtold *et al.*, 2014), the caterpillars have a non-  
119 functional dorsal nectary organ (DNO). That is, they do not establish a typical food-for-  
120 defense mutualistic interaction with them, being considered a commensal  
121 myrmecophilous (i.e. an organism that indirectly interacts with ants) (Kaminski & Freitas,  
122 2010; Silva *et al.*, 2014).

123 2) *Chalybs hassan* (Stoll, 1790) – polyphagous caterpillar on flower buds of Araliaceae,  
124 Fabaceae, Sapindaceae, and Sterculiaceae (LAK, unpublished data) with DNO, but  
125 without evidence on its functionality and role in the myrmecophily.

126 3) *Michaelus thordesa* (Hewitson, 1867) – polyphagous caterpillar, but it occurs more  
127 frequently on tubular flower buds of Bignoniaceae, living inside of the flowers. It is a  
128 facultative myrmecophilous with functional DNO (Silva *et al.*, 2014; Thiele & Kaminski,  
129 in prep.).

130 4) *Parrhasius polibetes* (Stoll, 1781) – polyphagous caterpillar with facultative  
131 myrmecophily and functional DNO since the third instar whereas the first and second are  
132 commensal myrmecophilous (Kaminski *et al.*, 2010a, 2012; Rodrigues *et al.*, 2010).

133 5) *Rekoa marius* (Lucas, 1857) – polyphagous caterpillar with facultative myrmecophily  
134 and functional DNOs on the third and last instars (Monteiro, 1991; Silva *et al.*, 2014;  
135 Faynel *et al.*, 2017).

136 6) *Rekoa stagira* (Hewitson, 1867) – polyphagous caterpillar with facultative  
137 myrmecophily and functional DNOs on the third and last instars (Faynel *et al.*, 2017;  
138 LAK, unpublished data).

139 On the host plants, we collected samples of two ant species, *Camponotus blandus*  
140 (Smith, 1858) and *Camponotus crassus* Mayr, 1862. These species are very common in  
141 Cerrado and are involved in most of the interactions between ants and trophobionts on  
142 plants, including myrmecophilous caterpillars (e.g. Alves-Silva *et al.*, 2013; Bächtold,  
143 2014; Lange *et al.*, 2019).

144 The hatched eggs and caterpillars were reared on buds or flowers of their host plants  
145 in an uncontrolled environment in the laboratory. For further chemical analysis, the  
146 desired developmental stage (different larval instar) of butterflies, as well the buds or  
147 flowers of host plants, and tending ants were killed by freezing and kept frozen at -20°C  
148 until the extraction of CHCs. When it was available, we collected both the second instar,  
149 which does not produce a reward secretion and the fourth instar (last instar from now on),  
150 which may produce it. We collected the following samples for further analysis: *B.*

151 *intermedia* (N = 2 buds, N = 1 flowers); *P. venusta* (N = 1 buds, N = 1 flowers); *S. vinosa*  
152 (N = 1 buds); *A. strophius* (N = 2 last instars on *B. intermedia*); *C. hassan* (N = 1 last  
153 instar on *S. vinosa*); *M. thordesa* (N = 1 last instar on *P. venusta*); *P. polibetes* (N = 1  
154 second instar, N = 2 last instars on *B. intermedia*, N = 4 last instars on *P. venusta*, and N  
155 = 1 last instar on *S. vinosa*); *R. marius* (N = 1 last instar on *P. venusta* and N = 1 last instar  
156 on *S. vinosa*); *R. stagira* (N = 1 last instar on *B. intermedia*); *C. blandus* (N = 1 pool of  
157 20 workers) and *C. crassus* (N = 1 pool of 20 workers).

158

### 159 *Extraction and Identification of Cuticular Compounds*

160 CHCs of the organisms were extracted following Portugal & Trigo (2005). The  
161 organisms were dipped in 5 ml of *n*-hexane (95%, Ultra-Resi-Analysed J.T.Baker) for 5  
162 min and then removed with a forceps. The hexane was subsequently treated with  
163 anhydrous Na<sub>2</sub>SO<sub>4</sub>, filtered, and evaporated gently in a stream of N<sub>2</sub>. The CHC extracts  
164 were analyzed using electron impact gas chromatography–mass spectrometry in a gas  
165 chromatograph (Hewlett Packard 6890) equipped with a column HP-5MS (5% phenyl  
166 methyl siloxane capillary 95%, 30 m x 250 µm x 0.25 µm; Hewlett Packard) directly  
167 coupled to a mass selective detector (Hewlett Packard 5973). All analyses were performed  
168 under the following conditions: 250°C temperature of injection; 60°-300°C to 2°C/min,  
169 20 min at 300°C program temperature; helium 1 mL/min as carrier gas; ionization energy  
170 of 70 eV and a range of 40–600 amu; splitless injection mode, 1 µl injected. All samples  
171 were analyzed without and with co-injection with consecutive *n*-alkane standards for the  
172 determination of Kovats Retention Index (KI). The alkanes and alkenes were identified  
173 by their KI (Carlson *et al.*, 1998) and by fragmentation patterns (Nelson *et al.*, 1981;  
174 Pomonis, 1989; Carlson *et al.*, 1999; Howard, 2001). The identification of alkenes was  
175 confirmed after derivatization with dimethyldisulfide for determination of double-bond



176 position (Francis & Veland, 1981). The fragmentation pattern of *n*-alcohols was  
177 compared with the literature (Wang *et al.*, 2007). The identification of *n*-alcohols was  
178 confirmed after derivatization with *N*-methyl-*N*-trimethylsilyltrifluoroacetamide  
179 (MSTFA; 100 mL MSTFA, 80°C, 1 h) according to Menéndez *et al.* (2005). We  
180 tentatively assigned some cuticular compounds (e.g. squalene-like) by using the NIST  
181 Mass Spectral Search Program (Agilent Technologies, Version 2.0 f. 2008) together with  
182 the mass fragmentation interpretation of Budzikiewicz *et al.* (1967). The other  
183 compounds remained as unknown.

184

### 185 *Statistical Analyses*

186 To test our hypothesis, we calculated the percentage of absolute abundance of the  
187 compounds found in the cuticular extracts by taking the compounds as 100%. From these  
188 data, we calculated the relative abundance, that is, the quantity of each separate compound  
189 expressed as a percentage of the total occurrence of the class of substance. We compared  
190 the percentage of similarity of the CHC profiles of the species studied by a hierarchical  
191 cluster analysis with a Morisita's similarity index (SI). This index varies from 0% (no  
192 similarity) to about 100% (complete similarity) (Krebs, 1999). We used an analysis of  
193 similarity (ANOSIM) for testing significant differences based on the percentage of  
194 similarity of the CHC profiles between species. To facilitate comparisons, we partitioned  
195 the data into two separate analyses. First, we divided species in three groups: caterpillars  
196 (group 1), ants (group 2), and plants (group 3). Second, we divided species in four groups:  
197 commensal caterpillars (group 1), mutualistic caterpillars (group 2), ants (group 3), and  
198 plants (group 4). In these analyses, it was possible to calculate R values from close or  
199 equal 0 (total similarity) to 1 (total difference) between the groups (see Clarke, 1993). As  
200 *C. hassan* does not have the kind of ant association (commensal or mutualistic) confirmed

201 it was not analyzed in the second comparison. All the analyses were performed on PAST  
202 software (Version 4.03). We considered values above 80% similarity between caterpillars  
203 and host plant as possible cases of chemical camouflage strategy. This value was defined  
204 based on the bioassays carried out by Silveira *et al.* (2010) who showed this value to be  
205 sufficient to significantly reduce detection in myrmecophilous insects chemically  
206 camouflaged against *Camponotus* ants.

207

## 208 **Results**

209 The analyses by gas chromatography–mass spectrometry of the cuticular extracts  
210 revealed a high similarity between lycaenid caterpillars and their host plants corroborated  
211 by the ANOSIM ( $R_{\text{ANOSIM}} = 0.20$ ;  $P < 0.05$ ) (Figs. 2-3 and 5; Tables 1 and S1-S5). In  
212 general, the lycaenid caterpillars and the host plants showed *n*-alkanes (C27 and C29) as  
213 their main components (Figs. 2-3; Tables S1-S3). The highest SIs occurred between  
214 lycaenids that fed on *B. intermedia* varying from 35% to 98%, followed by those that fed  
215 on *P. venusta* varying from 55% to 90%, when on *S. vinosa* similarity was low, varying  
216 from 23% to 34% (Figs. 2-3 and 5; Table 1). We found evidence of chemical camouflage  
217 (similarity > 80%) in four lycaenid caterpillar species: *A. strophius* (98%), *P. polibetes*  
218 (second instar) (96%) and *R. stagira* (96%) on *B. intermedia*, and *R. marius* on *P. venusta*  
219 (90%) (Fig. 5). The highest values of convergence with the host plant were found in the  
220 commensal myrmecophilous that do not have functional DNO gland that produce nectar  
221 rewards ANOSIM ( $R_{\text{ANOSIM}} = -0.08$ ;  $P > 0.05$ ), i.e. *A. strophius* (98%), as well as the  
222 second instar of *P. polibetes* (96%) (Figs. 2-3 and 5; Tables 1 and S5).

223 Last instars of the myrmecophilous species *P. polibetes* and *R. marius* have  
224 conspicuous and less variable profiles, less affected by the host plant composition.  
225 Surprisingly, there were also high SIs between some caterpillar species regardless of the

226 host plant used. For example, last instars of *M. thordesa* and *P. polibetes* (from 84% to  
227 95%) and last instars of *C. hassan* and *M. thordesa* (76%) that were higher than those  
228 with their host plants (Figs. 2-3; Table 1). In general, *P. polibetes* SIs in the last instar  
229 were higher with other lycaenids (25% to 95%) than with the host plant used (27% to  
230 66%) (Figs. 2-3; Table 1). Moreover, according to ANOSIM the mutualistic caterpillars  
231 did not have a high similarity with plants ( $R_{ANOSIM} = 0.55$ ;  $P < 0.05$ ; Table S5).

232 In contrast, the chemical similarity between lycaenid caterpillars and *Camponotus* ants  
233 was lower with a different pattern of cuticular compounds (SIs  $< 23\%$ , ANOSIM  $R_{ANOSIM}$   
234  $= 1$ ;  $P < 0.05$ ) (Figs. 4-5; Tables 1, S1, and S4-S5). *Camponotus blandus* and *C. crassus*  
235 workers showed mainly branched alkanes and unidentified compounds, and had a SI  
236 between them of 28% (Figs. 4-5).

237

## 238 Discussion

239 We found a high similarity of the CHC profiles ( $> 80\%$ ) in some species of lycaenid  
240 caterpillars and host plants from two plant families analyzed in this study, thus confirming  
241 our initial hypothesis. The fact that the CHC profiles were congruent with the plants the  
242 caterpillars were feeding on suggest these caterpillars can acquire these profiles through  
243 their diet, as it has been shown that the diet can be essential on the chemical camouflage  
244 strategy (e.g. Akino *et al.*, 2004; Lohman *et al.*, 2006; Lima *et al.*, in prep.). This kind of  
245 chemical camouflage, also called chemical crypsis or phytomimesis was suggested by  
246 Espelie *et al.* (1991) who found a similarity between the cuticular lipids of herbivorous  
247 insects and their host plants (see Akino *et al.*, 2004; Akino, 2005, 2008; von Beeren *et*  
248 *al.*, 2012; Lima & Kaminski, 2019). It was later reported for the first time in a non-  
249 trophobiont caterpillar of *Biston robustum* Butler 1879 (Geometridae) (Akino *et al.*, 2004;  
250 Akino, 2005). Caterpillars of the butterfly *Mechanitis polymnia* (Linnaeus, 1758)

251 (Ithomiinae) and the moth *Cydia pomonella* (Linnaeus, 1758) (Tortricidae) as well as  
252 larvae of the beetle *Chelymorpha reimoseri* Spaeth, 1928 (Chrysomelidae) and wasps  
253 also possess this defensive strategy against chemically oriented predators, including ants,  
254 for example (Portugal & Trigo, 2005; Piskorski *et al.*, 2010; Massuda & Trigo, 2014;  
255 Ranganathan *et al.*, 2015).

256 This strategy has been shown to avoid ants to recognize trophobiont treehoppers as  
257 prey (Silveira *et al.*, 2010) and to reduce ant attacks even in the absence of honeydew  
258 rewards (Wang *et al.*, 2018). However, to our knowledge, the chemical camouflage was  
259 only demonstrated in Lycaenidae with the entomophagous caterpillars of *Feniseca*  
260 *tarquinius* (Fabricius, 1793) which has a similar lipid composition to that of their aphid  
261 prey which is mutualistic with ants (Youngsteadt & DeVries 2005; Lohman *et al.*, 2006).  
262 Silveira *et al.* (2010) suggested that chemical camouflage could also occur on  
263 myrmecophilous lepidopteran caterpillars and that this strategy could function as insect  
264 analogs of extrafloral nectaries for ants. Thus, this is the first evidence of chemical  
265 camouflage on trophobiont caterpillars. It is known that ants may prey on trophobionts  
266 species producing less honeydew (Sakata *et al.*, 1995) and that lycaenid caterpillars can  
267 use their secretions to appease the aggressive behavior of ants (Hojo *et al.*, 2015).

268 Nonetheless, our results suggest that lycaenid caterpillars can use an additional CHCs-  
269 mediated strategy through chemical background matching even when they are unable to  
270 secrete honeydew. This happens either because they were on the second instar when their  
271 DNOs that produce nutritious secretions for ants are not functional (see Fiedler, 1991;  
272 Kaminski *et al.*, 2010a) or when they are in the pupal stage when DNOs are not retained  
273 (Mizuno *et al.*, 2018). Indeed, some of the highest values of similarities between  
274 caterpillars and host plants that we found were obtained for *A. strophius*, a commensal  
275 myrmecophilous that does not produce nectar rewards (Kaminski & Freitas, 2010;

276 Bächtold *et al.*, 2014). The cuticular compounds of the facultative myrmecophilous  
277 lycaenid pupa *Lycaeides argyrognomon* (Berstrasser, 1779) contains not only CHCs but  
278 also several long-chained aliphatic aldehydes which suppress ant aggression even after  
279 certain myrmecophilous organs are non-functional (Mizuno *et al.*, 2018).

280 Moreover, myrmecophilous lycaenid caterpillars have several adaptations such as  
281 chemical defense from exocrine glands, hairiness, the thickness of larval cuticle, and/or  
282 construction of silken shelters that avoid ant aggression (Malicky, 1970; Pierce *et al.*,  
283 2002). They also have ant-associated organs: pore cupola organs (PCOs) that supposedly  
284 secrete substances to pacify ants, tentacle organs (TOs) and DNO (Pierce *et al.*, 2002).  
285 Lycaenid caterpillars with specialized parasitic lifestyle may use chemical or acoustic  
286 mimicry as well (e.g. Nash *et al.*, 2008; Barbero *et al.*, 2009). However, the low similarity  
287 of the CHC profile between caterpillars and ants studied here discards the hypothesis of  
288 this kind of chemical mimicry in facultative myrmecophilous interactions.

289 On the other hand, lycaenids are also benefited from ant protection and grooming  
290 (Hölldobler & Wilson, 1990; Fiedler *et al.*, 1996; Hojo *et al.*, 2014b) and ants may use  
291 the non-congruent CHCs of *Narathura japonica* (Murray, 1875) to learn how to recognize  
292 this mutualistic partner whereas they do not do the same with the non-ant-associated  
293 lycaenid, *Lycaena phlaeas* (Linnaeus, 1761) (Hojo *et al.*, 2014b). According to Hojo *et*  
294 *al.* (2014a) multiple chemical signatures, not only CHCs, may be important for a  
295 myrmecophilous to exploit ants. Our study found high SIs among lycaenid species in  
296 unrelated genera. This convergence neither provides chemical camouflage on host plants  
297 nor chemical mimicry with tending ants. Thus, we propose the ‘chemical conspicuity’ as  
298 a strategy mediated by CHCs in myrmecophilous caterpillars. In this scenario, we can  
299 hypothesize the existence of Müllerian mimicry rings between myrmecophilous species  
300 with functional DNO, i.e. honest signal between true mutualistic partners (Rossato &

301 Kaminski, 2019). Batesian mimicry could also occur when caterpillars that invest little  
302 energy in secretions mimic CHCs of conspicuous caterpillars that secrete better caloric  
303 rewards for ants. A similar scenario was proposed by Oliver & Stein (2011) that  
304 caterpillar species lacking DNO could chemically mimic rewarding ones to gain  
305 protection by tending ants. Extensive comparative studies can reveal whether these  
306 chemical strategies can occur at the community level.

307 This, together with other studies, reinforces the importance of chemical camouflage to  
308 be selected in herbivorous insects to live in host plants frequently visited by ants (Akino,  
309 2008; Silveira *et al.*, 2010). The chemical camouflage may have arisen as a defensive  
310 strategy of caterpillars allowing coexistence with ants on plants. In multimodal systems  
311 with signals and cues between caterpillars and ants (see Casacci *et al.*, 2019) the CHC  
312 composition can play a key adaptive role to decrease ant attacks and increase their  
313 protection and consequently their survival. Myrmecophilous caterpillar assemblages can  
314 be quite rich in species that use different plant resources that vary in terms of nutritional  
315 quality and enemy-free space (Seufert & Fiedler, 1996; Rodrigues *et al.*, 2010; Silva *et*  
316 *al.*, 2014). Our study adds a new adaptive layer of variation regarding the degree of  
317 similarity and camouflage efficiency that different host plants can offer for  
318 myrmecophilous caterpillars. We hope that our study can serve as an incentive for further  
319 studies with the chemical interface of caterpillar-ant-plant interactions.

320

### 321 **Acknowledgments**

322 We thank Laboratório Síncrotron for allowing us to work in its cerrado area, and Instituto  
323 de Botânica de São Paulo for giving permission to work at the Reserva Biológica and  
324 Estação Experimental de Mogi-Guaçu. Special thanks to André V. L. Freitas and Paulo  
325 S. Oliveira for logistic support at UNICAMP and encouragement to study the chemical

326 interface in plant-ant-butterflies' interactions. Daniela Rodrigues and Adilson Moreira  
327 kindly assisted with the fieldwork. We are grateful to Sabrina C. Thiele for providing the  
328 *Michaelus* photo and to Fábio S. do Nascimento, Geraldo L. G. Soares and Viviane G.  
329 Ferro for critically reviewing the manuscript. This study was financed by the  
330 Coordenação de Aperfeiçoamento de Pessoal de Nível Superior – Brasil (CAPES) –  
331 Finance Code 001 as a PhD grant to LDL. JRT acknowledges grants from Fundação de  
332 Amparo à Pesquisa do Estado de São Paulo (FAPESP) (2011/17708-0) and Conselho  
333 Nacional de Pesquisa (CNPq) (2009/304473-0). LAK acknowledges grants from CNPq  
334 (140183/2006-0), FAPESP (10/51340-8), PNPd-CAPES, and National Geographic  
335 Society (#WW-224R-17).

336

### 337 **Contribution of authors**

338 All authors contributed to the study conception and design. LDL carried out the statistical  
339 analyses and wrote the manuscript. JRT carried out the chemical analyses and drafted the  
340 study. LAK collected the organisms, coordinated the study and critically revised the  
341 manuscript. All authors gave final approval for publication.

342

### 343 **Conflicts of interest**

344 The authors declare they have no conflicts of interest.

345

### 346 **Data availability statement**

347 The data that support the findings of this study are openly available at  
348 <https://doi.org/10.6084/m9.figshare.12584765>.

349

350

351 **References**

- 352 Akino, T. (2005) Chemical and behavioral study on the phytomimetic giant geometer  
353 *Biston robustum* Butler (Lepidoptera: Geometridae). *Applied Entomology and*  
354 *Zoology*, **40**, 497–505. <https://doi.org/10.1303/aez.2005.497>.
- 355 Akino, T. (2008) Chemical strategies to deal with ants: a review of mimicry, camouflage,  
356 propaganda, and phytomimesis by ants (Hymenoptera: Formicidae) and other  
357 arthropods. *Myrmecological News*, **11**, 173–181.
- 358 Akino, T., Nakamura, K.-i. & Wakamura, S. (2004) Diet-induced chemical phytomimesis  
359 by twig-like caterpillars of *Biston robustum* Butler (Lepidoptera: Geometridae).  
360 *Chemoecology*, **14**, 165–174. <https://doi.org/10.1007/s00049-004-0274-4>.
- 361 Alves-Silva, E., Bächtold, A., Barônio, G.J. & Del-Claro, K. (2013) Influence of  
362 *Camponotus blandus* (Formicinae) and flower buds on the occurrence of *Parrhasius*  
363 *polibetes* (Lepidoptera: Lycaenidae) in *Banisteriopsis malifolia* (Malpighiaceae).  
364 *Sociobiology*, **60**, 30–34.
- 365 Bächtold, A. (2014) A comunidade de borboletas licenídeos de uma área de cerrado:  
366 especificidade de dieta, interações ecológicas e seleção de plantas hospedeiras.  
367 Dissertation, Universidade de São Paulo, Brazil.
- 368 Bächtold, A., Alves-Silva, E., Kaminski, L.A. & Del-Claro, K. (2014) The role of tending  
369 ants in host plant selection and egg parasitism of two facultative myrmecophilous  
370 butterflies. *Naturwissenschaften*, **101**, 913–919. [https://doi.org/10.1007/s00114-014-](https://doi.org/10.1007/s00114-014-1232-9)  
371 [1232-9](https://doi.org/10.1007/s00114-014-1232-9).
- 372 Barbero, F., Thomas, J.A., Bonelli, S., Balletto, E. & Schönrogge, K. (2009) Queen ants  
373 make distinctive sounds that are mimicked by a butterfly social parasite. *Science*, **323**,  
374 782–785. <https://doi.org/10.1126/science.1163583>.



- 375 Budzikiewicz, H., Djerassi, C. & Williams, D.H. (1967) *Mass spectrometry of organic*  
376 *compounds*. Holden-Day Inc, San Francisco, USA.
- 377 Carlson, D.A., Geden, C.J. & Bernier, U.R. (1999) Identification of pupal exuviae of  
378 *Nasonia vitripennis* and *Muscidifurax raptorellus* parasitoids using cuticular  
379 hydrocarbons. *Biological Control*, **15**, 97–106.  
380 <https://doi.org/10.1006/bcon.1999.0708>.
- 381 Carlson, D.A., Offor, I.I., El Messoussi, S., Matsuyama, K., Mori, K. & Jallon, J.-M.  
382 (1998) Sex pheromone of *Glossina tachinoides*: isolation, identification and synthesis.  
383 *Journal of Chemical Ecology*, **24**, 1563–1575.  
384 <https://doi.org/10.1023/A:1020967918594>.
- 385 Casacci, L.P., Bonelli, S., Balletto, E. & Barbero, F. (2019) Multimodal signaling in  
386 myrmecophilous butterflies. *Frontiers in Ecology and Evolution*, **7**, 454.  
387 <https://doi.org/10.3389/fevo.2019.00454>.
- 388 Clarke, K.R. (1993) Non-parametric multivariate analyses of changes in community  
389 structure. *Australian Journal of Ecology*, **18**, 117–143.
- 390 Daniels, H., Gottsberger, G. & Fiedler, K. (2005) Nutrient composition of larval nectar  
391 secretions from three species of myrmecophilous butterflies. *Journal of Chemical*  
392 *Ecology*, **31**, 2805–2821. <https://doi.org/10.1007/s10886-005-8395-y>.
- 393 DeVries, P.J. (1990) Enhancement of symbioses between butterfly caterpillars and ants  
394 by vibrational communication. *Science*, **248**, 1104–1106.  
395 <https://doi.org/10.1126/science.248.4959.1104>.

- 396 Espelie, K.E., Bernays, E.A. & Brown, J.J. (1991) Plant and insect cuticular lipids serve  
397 as behavioral cues for insects. *Archives of Insect Biochemistry and Physiology*, **17**,  
398 223–233. <https://doi.org/10.1002/arch.940170406>.
- 399 Faynel, C., Bénéluz, F., Brûlé, S. & Fernandez, S. (2017) *Dioclea guianensis* et *Dioclea*  
400 *virgata* (Fabaceae): plantes hôtes de nombreux Lycaenidae et Riodinidae en Guyane.  
401 Exemples de polychromatisme larvaire cryptique (Lepidoptera). *Revue de*  
402 *l'Association Roussillonaise d'Entomologie*, **26**, 135–143.
- 403 Fiedler, K. (1991) Systematic, evolutionary, and ecological implications of  
404 myrmecophily within the Lycaenidae (Insecta: Lepidoptera: Papilionoidea). *Bonner*  
405 *Zoologische Monographien*, **31**, 1–210.
- 406 Fiedler, K., Hölldobler, B. & Seufert, P. (1996) Butterflies and ants: the communicative  
407 domain. *Experientia*, **52**, 14–24. <https://doi.org/10.1007/BF01922410>.
- 408 Fischer, M.K., Hoffmann, K.H. & Völkl, W. (2001) Competition for mutualists in an ant–  
409 homopteran interaction mediated by hierarchies of ant attendance. *Oikos*, **92**, 531–541.  
410 <https://doi.org/10.1034/j.1600-0706.2001.920314.x>.
- 411 Floren, A., Biun, A. & Linsenmair, K.E. (2002) Arboreal ants as key predators in tropical  
412 lowland rainforest trees. *Oecologia*, **131**, 137–144. [https://doi.org/10.1007/s00442-](https://doi.org/10.1007/s00442-002-0874-z)  
413 [002-0874-z](https://doi.org/10.1007/s00442-002-0874-z).
- 414 Francis, G.W. & Veland, K. (1981) Alkylthiolation for the determination of double-bond  
415 positions in linear alkenes. *Journal of Chromatography*, **219**, 379–384.  
416 [https://doi.org/10.1016/S0021-9673\(00\)80381-7](https://doi.org/10.1016/S0021-9673(00)80381-7).
- 417 Gibernau, M. & Dejean, A. (2001) Ant protection of a Heteropteran trophobiont against  
418 a parasitoid wasp. *Oecologia*, **126**, 53–57. <https://doi.org/10.1007/s004420000479>.

- 419 Hammer, Ø., Harper, D.A.T. & Ryan, P.D. (2001) PAST: Paleontological Statistics  
420 Software Package for Education and Data Analysis. *Palaeontologia Electronica*, **4**, 1–  
421 9.
- 422 Hojo, M.K., Pierce, N.E. & Tsuji, K. (2015) Lycaenid caterpillar secretions manipulate  
423 attendant ant behavior. *Current Biology*, **25**, 2260–2264.  
424 <http://doi.org/10.1016/j.cub.2015.07.016>.
- 425 Hojo, M.K., Yamaguchi, S., Akino, T. & Yamaoka, R. (2014a) Adoption of lycaenid  
426 *Niphanda fusca* (Lepidoptera: Lycaenidae) caterpillars by the host ant *Camponotus*  
427 *japonicus* (Hymenoptera: Formicidae). *Entomological Science*, **17**, 59–65.  
428 <https://doi.org/10.1111/ens.12041>.
- 429 Hojo, M.K., Yamamoto, A., Akino, T., Tsuji, K. & Yamaoka, R. (2014b) Ants use partner  
430 specific odors to learn to recognize a mutualistic partner. *Plos One*, **9**, e86054.  
431 <https://doi.org/10.1371/journal.pone.0086054>.
- 432 Hölldobler, B. & Wilson, E.O. (1990) *The Ants*. The Belknap Press of Harvard University  
433 Press, Cambridge, USA.
- 434 Howard, R.W. (2001) Cuticular hydrocarbons of adult *Pteromalus cerealellae*  
435 (Hymenoptera: Pteromalidae) and two larval hosts, Angoumois grain moth  
436 (Lepidoptera: Gelechiidae) and cowpea weevil (Coleoptera: Bruchidae). *Annals of the*  
437 *Entomological Society of America*, **94**, 152–158. [https://doi.org/10.1603/0013-](https://doi.org/10.1603/0013-8746(2001)094[0152:CHOAPC]2.0.CO;2)  
438 [8746\(2001\)094\[0152:CHOAPC\]2.0.CO;2](https://doi.org/10.1603/0013-8746(2001)094[0152:CHOAPC]2.0.CO;2).
- 439 Kaminski, L.A. & Freitas, A.V.L. (2010) Natural history and morphology of immature  
440 stages of the butterfly *Allosmaitia strophius* (Godart) (Lepidoptera: Lycaenidae) on  
441 flower buds of Malpighiaceae. *Studies on Neotropical Fauna and Environment*, **45**,  
442 11–19. <https://doi.org/10.1080/01650520903495826>.

- 443 Kaminski, L.A., Freitas, A.V.L. & Oliveira, P.S. (2010a) Interaction between  
444 mutualisms: ant-tended butterflies exploit enemy-free space provided by ant-  
445 treehopper associations. *American Naturalist*, **176**, 322–334.  
446 <http://doi.org/10.1086/655427>.
- 447 Kaminski, L.A., Rodrigues, D. (2011) Species-specific levels of ant attendance mediate  
448 performance costs in a facultative myrmecophilous butterfly. *Physiological*  
449 *Entomology*, **36**, 208–214. <https://doi.org/10.1111/j.1365-3032.2011.00785.x>.
- 450 Kaminski, L.A., Rodrigues, D. & Freitas, A.V.L. (2012) Immature stages of *Parrhasius*  
451 *polibetes* (Lepidoptera: Lycaenidae): host plants, tending ants, natural enemies and  
452 morphology. *Journal of Natural History*, **46**, 645–667.  
453 <http://doi.org/10.1080/00222933.2011.651630>.
- 454 Kaminski, L.A., Thiele, S.C., Iserhard, C.A., Romanowski, H.P. & Moser, A. (2010b)  
455 Natural history, new records, and notes on the conservation status of *Cyanophrys*  
456 *bertha* (Jones) (Lepidoptera: Lycaenidae). *Proceedings of the Entomological Society*  
457 *of Washington*, **112**, 54–60. <https://doi.org/10.4289/0013-8797-112.1.54>.
- 458 Krebs, C.J. (1999) *Ecological Methodology*. Addison Wesley Longman, Menlo Park,  
459 USA.
- 460 Lange, D., Calixto, E.S., Rosa, B.B., Sales, T.A. & Del-Claro, K. (2019) Natural history  
461 and ecology of foraging of the *Camponotus crassus* Mayr, 1862 (Hymenoptera:  
462 Formicidae). *Journal of Natural History*, **53**, 1737–1749.  
463 <https://doi.org/10.1080/00222933.2019.1660430>.
- 464 Lima, L.D. & Kaminski, L.A. (2019) Camouflage. *Encyclopedia of Animal Cognition*  
465 *and Behavior* (ed. by J. Vonk and T. Shackelford), pp. 1–9. Springer Nature, Cham,  
466 Switzerland.

- 467 Lohman, D.J., Liao, Q. & Pierce, N.E. (2006) Convergence of chemical mimicry in a  
468 guild of aphid predators. *Ecological Entomology*, **31**, 41–51.  
469 <https://doi.org/10.1111/j.0307-6946.2006.00758.x>.
- 470 Malicky, H. (1970) New aspects on the association between lycaenid larvae (Lycaenidae)  
471 and ants (Formicidae, Hymenoptera). *Journal of the Lepidopterists' Society*, **24**, 190–  
472 202.
- 473 Massuda, K.F. & Trigo, J.R. (2014) Hiding in plain sight: cuticular compound profile  
474 matching conceals a larval tortoise beetle in its host chemical cloud. *Journal of*  
475 *Chemical Ecology*, **40**, 341–354. <https://doi.org/10.1007/s10886-014-0424-2>.
- 476 Menéndez, R., Marrero, D., Más, R., Fernández, I., González, L. & González, R.M.  
477 (2005) *In vitro* and *in vivo* study of octacosanol metabolism. *Archives of Medical*  
478 *Research*, **36**, 113–119. <https://doi.org/10.1016/j.arcmed.2004.12.006>.
- 479 Mizuno, T., Hagiwara, Y., Akino, T. (2018) Chemical tactic of facultative  
480 myrmecophilous lycaenid pupa to suppress ant aggression. *Chemoecology*, **28**, 173–  
481 182. <https://doi.org/10.1007/s00049-018-0270-8>.
- 482 Monteiro, R.F. (1991) Cryptic larval polychromatism in *Rekoa marius* Lucas and *R.*  
483 *palegon* Cramer (Lycaenidae: Theclinae). *Journal of Research on the Lepidoptera*, **29**,  
484 77–84.
- 485 Nash, D.R., Als, T.D., Maile, R., Jones, G.R. & Boomsma, J.J. (2008) A mosaic of  
486 chemical coevolution in a large blue butterfly. *Science*, **319**, 88–90.  
487 <https://doi.org/10.1126/science.1149180>.
- 488 Nelson, D.R., Dillwith, J.W. & Blomquist, G.J. (1981) Cuticular hydrocarbons of the  
489 house fly, *Musca domestica*. *Insect Biochemistry*, **11**, 187–197.  
490 [https://doi.org/10.1016/0020-1790\(81\)90095-0](https://doi.org/10.1016/0020-1790(81)90095-0).

- 491 Oliveira-Filho, A.T. & Ratter, J.A. (2002) Vegetation physiognomies and woody flora of  
492 the Cerrado biome. *The cerrados of Brazil: Ecology and Natural History of a*  
493 *Neotropical savanna* (ed. by P. S. Oliveira and R. J. Marquis), pp. 91–120. Columbia  
494 University Press, New York, USA.
- 495 Oliver, J.C. & Stein, L.R. (2011) Evolution of influence: signaling in a lycaenid-ant  
496 interaction. *Evolutionary Ecology*, **25**, 1205–1216. [https://doi.org/10.1007/s10682-](https://doi.org/10.1007/s10682-011-9478-6)  
497 [011-9478-6](https://doi.org/10.1007/s10682-011-9478-6).
- 498 Pierce, M.P. (2019) The ecological and evolutionary importance of nectar-secreting galls.  
499 *Ecosphere*, **10**, e02670. <https://doi.org/10.1002/ecs2.2670>.
- 500 Pierce, N.E., Braby, M.F., Heath, A., Lohman, D.J., Mathew, J., Rand, D.B. & Travassos,  
501 M.A. (2002) The ecology and evolution of ant association in the Lycaenidae  
502 (Lepidoptera). *Annual Review of Entomology*, **47**, 733–771.  
503 <https://doi.org/10.1146/annurev.ento.47.091201.145257>.
- 504 Piskorski, R., Trematerra, P. & Dorn, S. (2010) Cuticular hydrocarbon profiles of codling  
505 moth larvae, *Cydia pomonella* (Lepidoptera: Tortricidae), reflect those of their host  
506 plant species. *Biological Journal of the Linnean Society*, **101**, 376–384.  
507 <https://doi.org/10.1111/j.1095-8312.2010.01511.x>.
- 508 Pomonis, J.G. (1989) Cuticular hydrocarbons of the screwworm, *Cochliomyia*  
509 *hominivorax* (Diptera: Calliphoridae). Isolation, identification and quantification as a  
510 function of age, sex and irradiation. *Journal of Chemical Ecology*, **15**, 2301–2317.  
511 <https://doi.org/10.1007/BF01012083>.
- 512 Portugal, A.H.A. & Trigo, J.R. (2005) Similarity of cuticular lipids between a caterpillar  
513 and its host plant: a way to make prey undetectable for predatory ants?. *Journal of*  
514 *Chemical Ecology*, **31**, 2551–2561. <https://doi.org/10.1007/s10886-005-7613-y>.

- 515 Pringle, E.G. (2020) Ant-Hemiptera associations. *Encyclopedia of Social Insects* (ed. by  
516 C. Starr), pp. 1–5. Springer Nature, Cham, Switzerland.
- 517 Ranganathan, Y., Bessièrè, J.-M. & Borges, R.M. (2015) A coat of many scents: cuticular  
518 hydrocarbons in multitrophic interactions of fig wasps with ants. *Acta Oecologica*, **67**,  
519 24–33. <https://doi.org/10.1016/j.actao.2015.05.007>.
- 520 Rico-Gray, V. & Oliveira, P.S. (2007) *The Ecology and Evolution of Ant-plant*  
521 *Interactions*. University of Chicago Press, Chicago, USA.
- 522 Robbins, R.K. (2004) Introduction to the checklist of Eumaeini (Lycaenidae). *Atlas of*  
523 *Neotropical Lepidoptera. Checklist: Part 4A. Hesperioidea — Papilionoidea, vol 5A*  
524 (ed. by J. B. Heppner and G. Lamas), pp. 118–137. Association for Tropical  
525 Lepidoptera, Scientific Publishers, Gainesville, USA.
- 526 Robbins, R.K. & Aiello, A. (1982) Foodplant and oviposition records for Panamanian  
527 Lycaenidae and Riodinidae. *Journal of the Lepidopterists' Society*, **36**, 65–75.
- 528 Rossato, D.O. & Kaminski, L.A. (2019) Müllerian mimicry. *Encyclopedia of Animal*  
529 *Cognition and Behavior* (ed. by J. Vonk and T. Shackelford), pp. 1–6. Springer Nature,  
530 Cham, Switzerland.
- 531 Rodrigues, D., Kaminski, L.A., Freitas, A.V.L. & Oliveira, P.S. (2010) Trade-offs  
532 underlying polyphagy in a facultative ant-tended florivorous butterfly: the role of host  
533 plant quality and enemy-free space. *Oecologia*, **16**, 719–728.  
534 <https://doi.org/10.1007/s00442-010-1626-0>.
- 535 Ruxton, G.D., Sherratt, T.N. & Speed, M.P. (2004) *Avoiding attack: the evolutionary*  
536 *ecology of crypsis, warning signals and mimicry*. Oxford University Press, New York,  
537 USA.

- 538 Sakata, H. (1995) Density-dependent predation of the ant *Lasius niger* (Hymenoptera:  
539 Formicidae) on two attended aphids *Lachnus tropicalis* and *Myzocallis kuricola*  
540 (Homoptera: Aphididae). *Researches on Population Ecology*, **37**, 159–164.  
541 <https://doi.org/10.1007/BF02515816>.
- 542 Seufert, P., Fiedler, K. (1996) The influence of ants on patterns of colonization and  
543 establishment within a set of coexisting lycaenid butterflies in a south-east Asian  
544 tropical rain forest. *Oecologia*, **106**, 127–136. <https://doi.org/10.1007/BF00334414>.
- 545 Silva, N.A.P., Duarte, M., Araújo, E.B. & Morais, H.C. (2014) Larval biology of  
546 anthophagous Eumaeini (Lepidoptera: Lycaenidae, Theclinae) in the Cerrado of  
547 central Brazil. *Journal of Insect Science*, **14**, 2014.  
548 <https://doi.org/10.1093/jisesa/ieu046>.
- 549 Silveira, H.C.P., Oliveira, P.S. & Trigo, J.R. (2010) Attracting predators without falling  
550 prey: chemical camouflage protects honeydew-producing treehoppers from ant  
551 predation. *American Naturalist*, **175**, 261–268. <https://doi.org/10.1086/649580>.
- 552 Vidal, M.C. & Murphy, S.M. (2018) Bottom-up vs. top-down effects on terrestrial insect  
553 herbivores: a meta-analysis. *Ecology Letters*, **21**, 138–150.  
554 <https://doi.org/10.1111/ele.12874>.
- 555 von Beeren, C., Pohl, S. & Witte, V. (2012) On the use of adaptive resemblance terms in  
556 chemical ecology. *Psyche*, **2012**, 635761. <https://doi.org/10.1155/2012/635761>.
- 557 Wang, B., Lu, M., Cook, J.M., Yang, D.-R., Dunn, D.W. & Wang, R.-W. (2018)  
558 Chemical camouflage: a key process in shaping an ant-treehopper and fig-fig wasp  
559 mutualistic network. *Scientific Reports*, **8**, 1833. [https://doi.org/10.1038/s41598-018-](https://doi.org/10.1038/s41598-018-20310-7)  
560 [20310-7](https://doi.org/10.1038/s41598-018-20310-7).



- 561 Wang, M.-F., Lian, H.-Z., Mao, L., Zhou, J.-P., Gong, H.-J., Qian, B.-Y., Fang, Y. & Li,  
562 J. (2007) Comparison of various extraction methods for policosanol from rice bran  
563 wax and establishment of chromatographic fingerprint of policosanol. *Journal of*  
564 *Agricultural and Food Chemistry*, **55**, 5552–5558. <https://doi.org/10.1021/jf063623q>.
- 565 Youngsteadt, E. & DeVries, P.J. (2005) The effects of ants on the entomophagous  
566 butterfly caterpillar *Feniseca tarquinius*, and the putative role of chemical camouflage  
567 in the *Feniseca*–ant interaction. *Journal of Chemical Ecology*, **31**, 2091–2109.  
568 <https://doi.org/10.1007/s10886-005-6079-2>.

**Table 1.** Morisita's similarity index (mean  $\pm$  standard error) of the shared cuticular hydrocarbons of lycaenid caterpillars, host plants, and tending ants. Similarity values  $> 0.8$  in bold

| Lycaenid caterpillars             | Host plants                       |                                   |                          | Lycaenid caterpillars             |                       |                                   |                                   |                                   |                     | Tending ants                      |                           |                           |
|-----------------------------------|-----------------------------------|-----------------------------------|--------------------------|-----------------------------------|-----------------------|-----------------------------------|-----------------------------------|-----------------------------------|---------------------|-----------------------------------|---------------------------|---------------------------|
|                                   | <i>Byrsonima intermedia</i>       | <i>Pyrostegia venusta</i>         | <i>Schefflera vinosa</i> | <i>Allosmaitia strophius</i>      | <i>Chalybs hassan</i> | <i>Michaelus thordesa</i>         | <i>Parrhasius polibetes</i> (S)   | <i>Parrhasius polibetes</i> (L)   | <i>Rekoa marius</i> | <i>Rekoa stagira</i>              | <i>Camponotus blandus</i> | <i>Camponotus crassus</i> |
| <i>Allosmaitia strophius</i> (L)* | <b>0.93 <math>\pm</math> 0.02</b> | –                                 | –                        | –                                 | 0.39 $\pm$ 0.00       | 0.25 $\pm$ 0.01                   | <b>0.85 <math>\pm</math> 0.00</b> | 0.34 $\pm$ 0.01                   | 0.39 $\pm$ 0.05     | <b>0.95 <math>\pm</math> 0.00</b> | 0.03 $\pm$ 0.00           | 0.08 $\pm$ 0.00           |
| <i>Chalybs hassan</i> (L)**       | –                                 | –                                 | 0.34                     | 0.39 $\pm$ 0.00                   | –                     | 0.76                              | 0.54                              | 0.78 $\pm$ 0.02                   | 0.62 $\pm$ 0.03     | 0.54                              | 0.09                      | 0.09                      |
| <i>Michaelus thordesa</i> (L)     | –                                 | 0.55 $\pm$ 0.00                   | –                        | 0.25 $\pm$ 0.01                   | 0.76                  | –                                 | 0.36                              | <b>0.80 <math>\pm</math> 0.06</b> | 0.58 $\pm$ 0.01     | 0.41                              | 0.05                      | 0.04                      |
| <i>Parrhasius polibetes</i> (S)*  | <b>0.90 <math>\pm</math> 0.03</b> | –                                 | –                        | <b>0.85 <math>\pm</math> 0.00</b> | 0.54                  | 0.36                              | –                                 | 0.51 $\pm$ 0.03                   | 0.54 $\pm$ 0.11     | <b>0.92</b>                       | 0.06                      | 0.13                      |
| <i>Parrhasius polibetes</i> (L)   | 0.44 $\pm$ 0.04                   | 0.60 $\pm$ 0.02                   | 0.27                     | 0.34 $\pm$ 0.01                   | 0.78 $\pm$ 0.02       | <b>0.80 <math>\pm</math> 0.06</b> | 0.51 $\pm$ 0.03                   | 0.77 $\pm$ 0.05                   | 0.66 $\pm$ 0.01     | 0.51 $\pm$ 0.03                   | 0.14 $\pm$ 0.02           | 0.10 $\pm$ 0.01           |
| <i>Rekoa marius</i> (L)           | -                                 | <b>0.82 <math>\pm</math> 0.08</b> | 0.23                     | 0.39 $\pm$ 0.05                   | 0.62 $\pm$ 0.03       | 0.58 $\pm$ 0.01                   | 0.54 $\pm$ 0.11                   | 0.66 $\pm$ 0.01                   | -                   | 0.53 $\pm$ 0.09                   | 0.06 $\pm$ 0.01           | 0.15 $\pm$ 0.04           |
| <i>Rekoa stagira</i> (L)          | <b>0.94 <math>\pm</math> 0.02</b> | -                                 | -                        | <b>0.95 <math>\pm</math> 0.00</b> | 0.54                  | 0.41                              | <b>0.92</b>                       | 0.51 $\pm$ 0.03                   | 0.53 $\pm$ 0.09     | –                                 | 0.03                      | 0.10                      |

\*Commensal myrmecophily, dorsal nectary organ (DNO) non-functional; L = last instar; S = second instar. \*\*Lack of data on DNO functionality and kind of ant association.

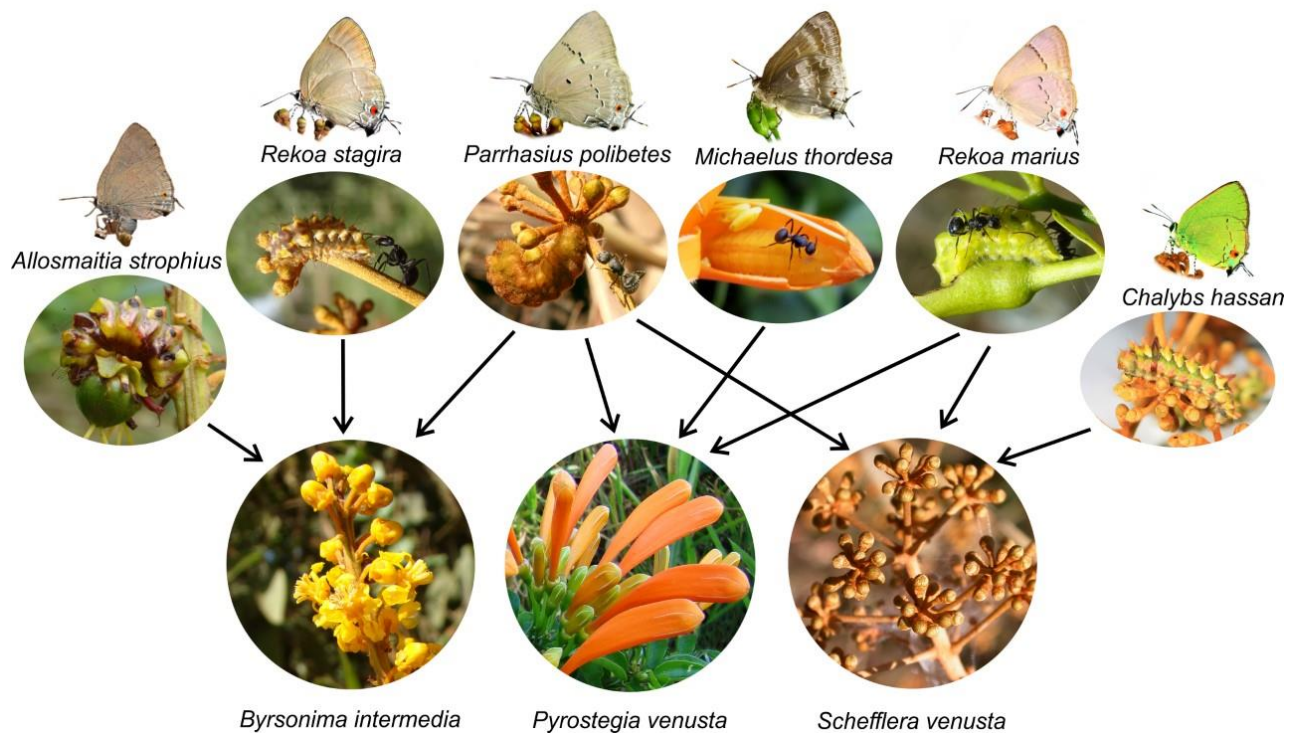

**Fig. 1.**

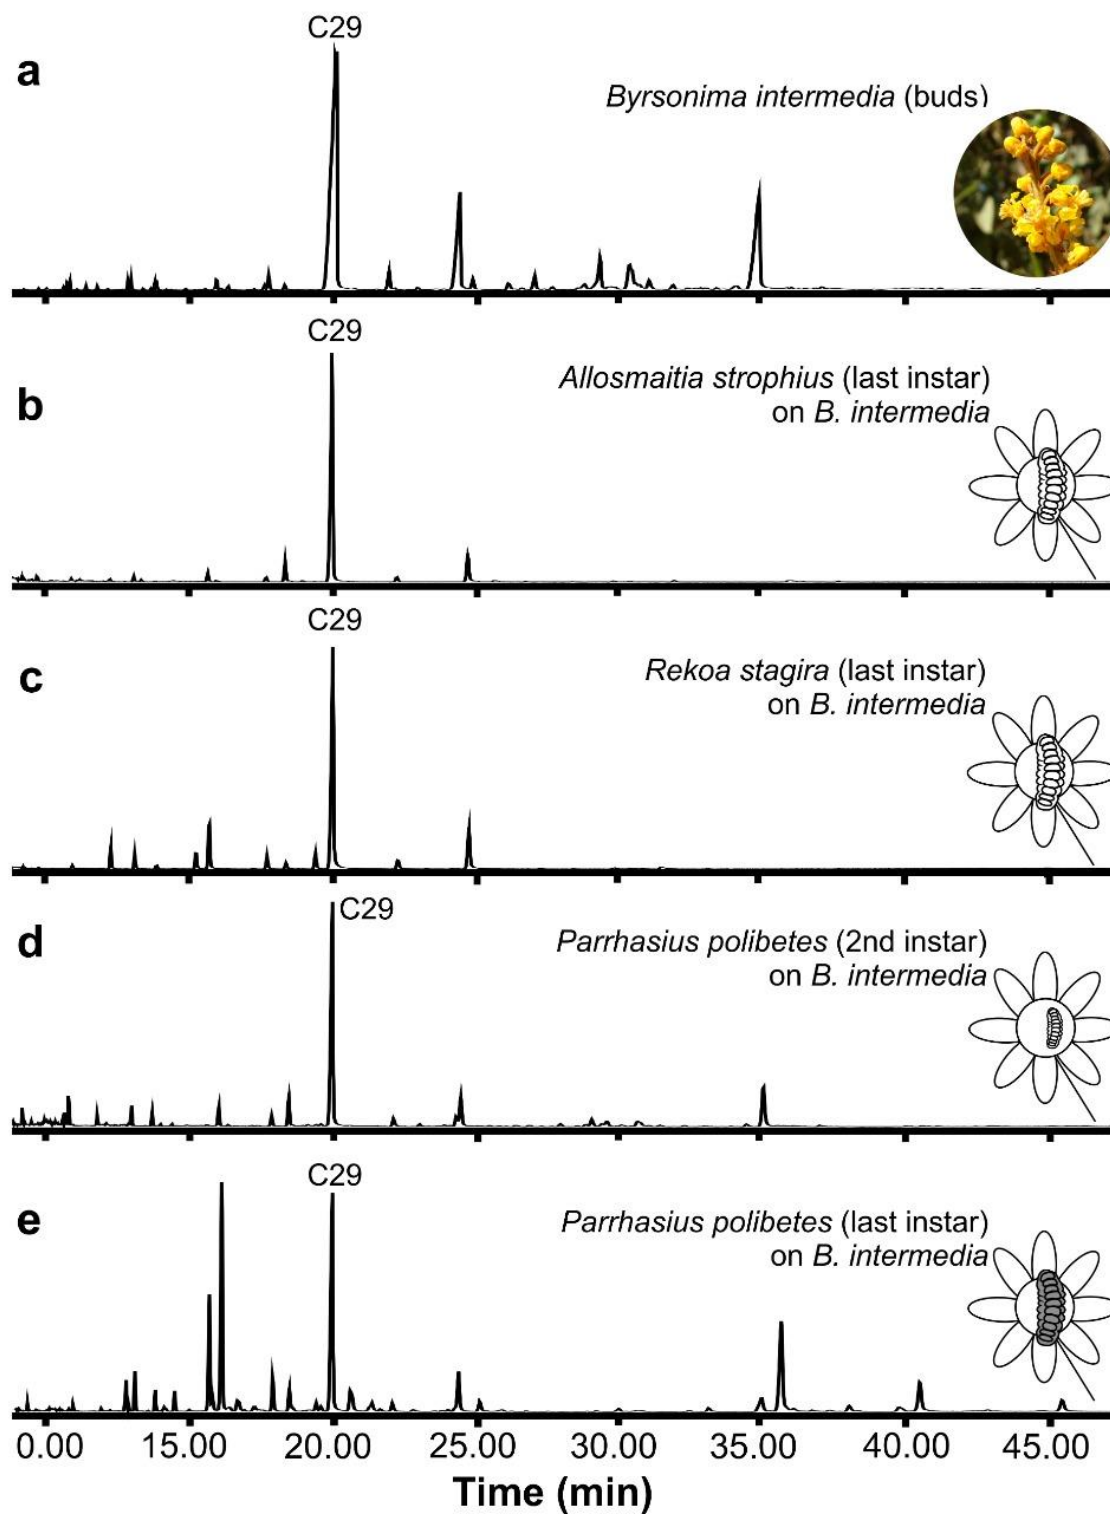

**Fig. 2.**

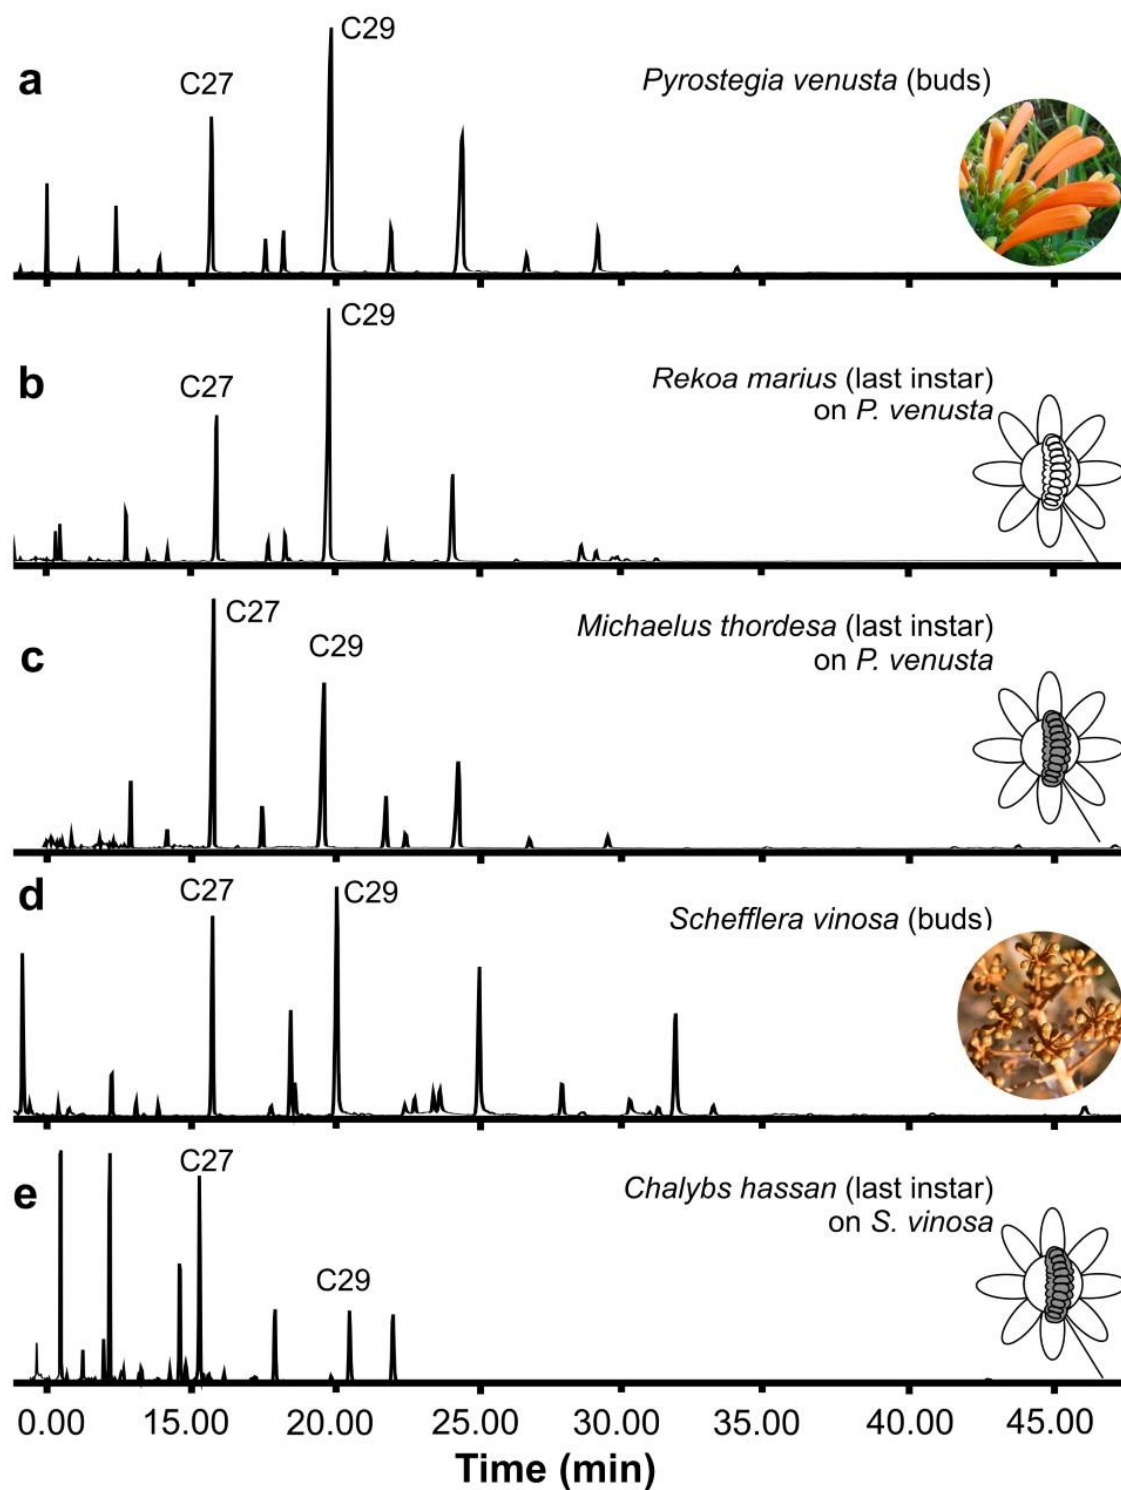

Fig. 3.

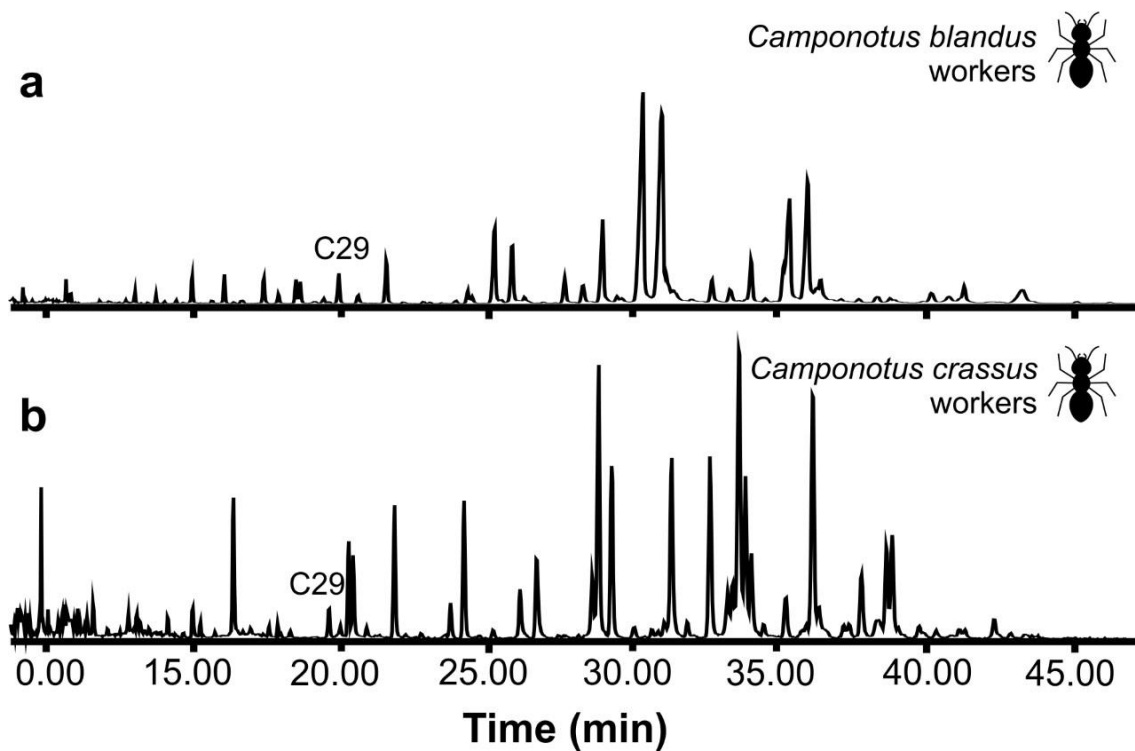

**Fig. 4.**

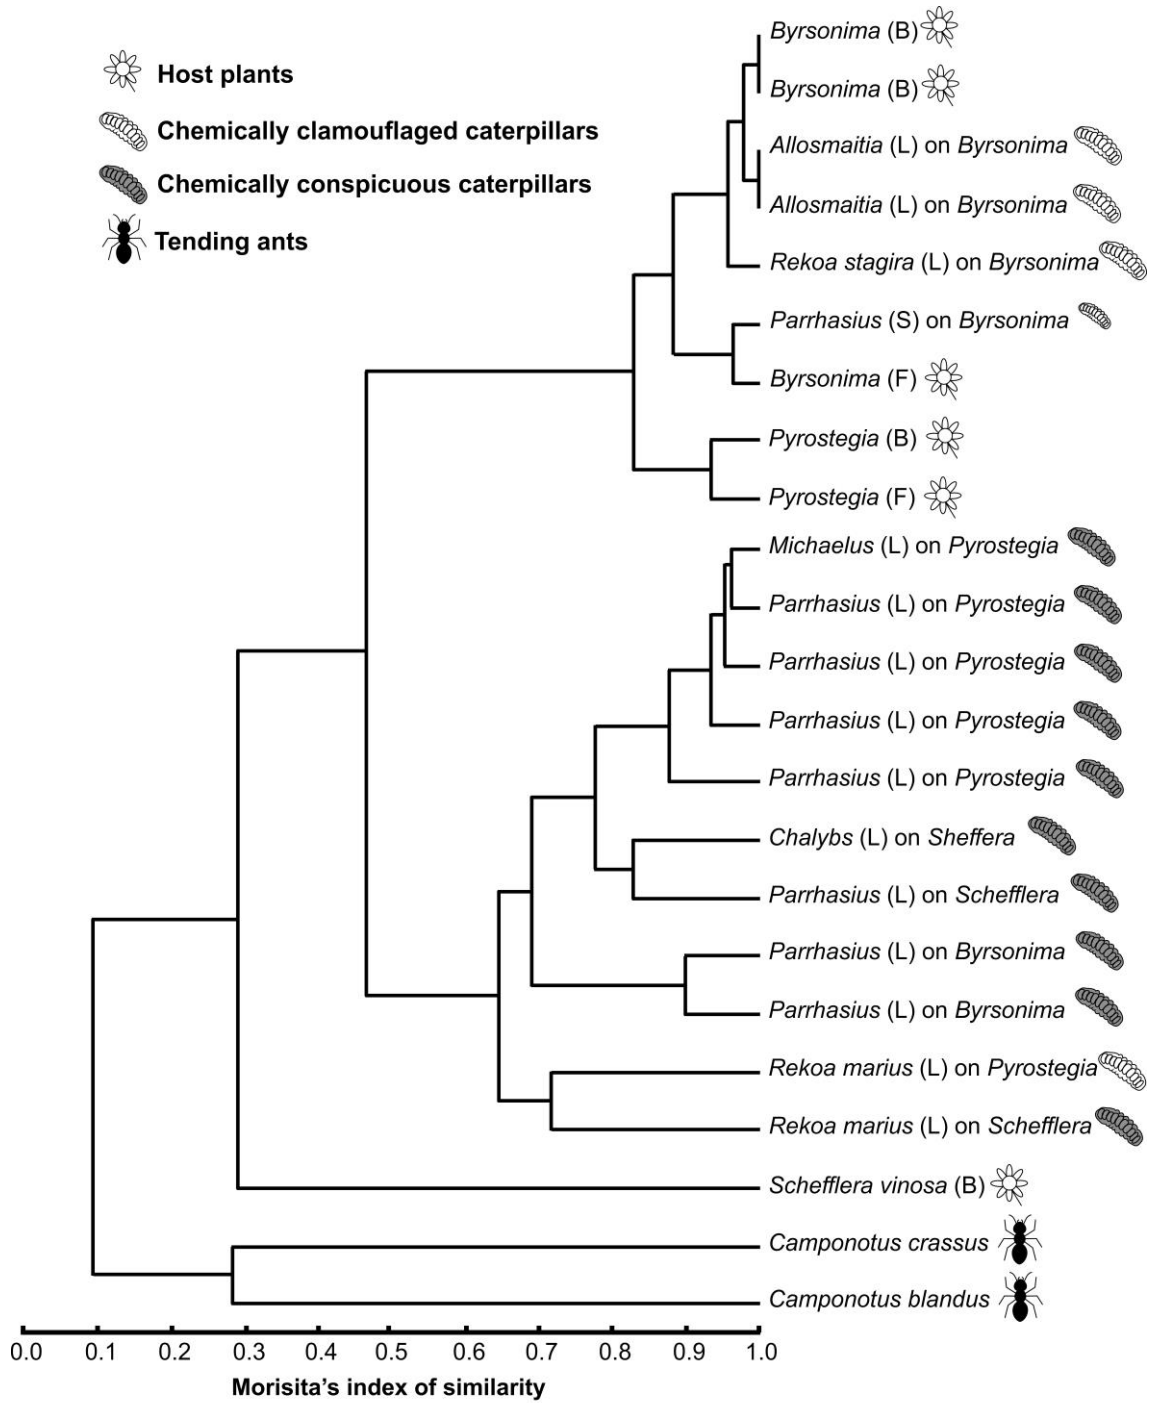

**Fig. 5.**

## Figure legends

**Fig. 1.** Multitrophic systems studied involving a guild of six facultative myrmecophilous caterpillars (Lepidoptera: Lycaenidae), tending ants (Hymenoptera: Formicidae) and host plant species in three families, Malpighiaceae, Bignoniaceae and Araliaceae, respectively. Photo of *Michaelus thordesa* caterpillar by Sabrina Thiele ©

**Fig. 2.** Chromatograms of the cuticular compounds of *Byrsonima intermedia* (Malpighiaceae) buds (a) and associated facultative myrmecophilous caterpillars (Lepidoptera: Lycaenidae) (b-e). b) last instar of *Allosmaitia strophius*, c) last instar of *Rekoa stagira*, d) second instar of *Parrhasius polibetes*, e) last instar of *P. polibetes*. Schematic white colored caterpillar represent cases of ‘chemical camouflage’ strategy (similarity > 80%) while gray colored caterpillars are ‘chemical conspicuity’ strategy

**Fig. 3.** Chromatograms of the cuticular compounds of host plants (a, d) and associated facultative myrmecophilous caterpillars (Lepidoptera: Lycaenidae) (b-c, e). a) *Pyrostegia venusta* (Bignoniaceae) buds (a), b) last instar of *Rekoa marius* on *P. venusta*, c) last instar of *Michaelus thordesa* on *P. venusta*, d) buds of *Schefflera vinosa* (Araliaceae), and e) last instar of *Chalybs hassan* on *S. vinosa*. Schematic white colored caterpillar represents cases of ‘chemical camouflage’ strategy (similarity > 80%) while gray colored caterpillars are cases of ‘chemical conspicuity’

**Fig. 4.** Chromatograms of the cuticular compounds of tending ants (Hymenoptera: Formicidae) a) *Camponotus blandus* workers, b) *Camponotus crassus* workers



**Fig. 5. Hierarchical cluster analysis (Ward's method, similarity index) of the shared cuticular**

hydrocarbons of facultative myrmecophilous caterpillars (Lepidoptera: Lycaenidae),

host plants, and tending ants. B = bud; F = flower; L = last instar; S = second instar

## Supporting Information

**Table S1.** Relative abundance (%) of cuticular compounds of the host plant *Byrsonima intermedia*, lycaenid caterpillars, and ants. Only compounds and values above 5% are shown

| Compounds                                 | Retention Index | <i>B. intermedia</i> (Bud) | <i>B. intermedia</i> (Bud) | <i>B. intermedia</i> (Flo) | <i>A. strophius</i> (last) | <i>A. strophius</i> (last) | <i>P. polibetes</i> (2nd) | <i>P. polibetes</i> (last) | <i>P. polibetes</i> (last) | <i>R. stagira</i> (last) | <i>C. blandus</i> | <i>C. crassus</i> |
|-------------------------------------------|-----------------|----------------------------|----------------------------|----------------------------|----------------------------|----------------------------|---------------------------|----------------------------|----------------------------|--------------------------|-------------------|-------------------|
| C <sub>25</sub>                           | 2500            | -                          | -                          | -                          | -                          | -                          | -                         | -                          | 11.84                      | -                        | -                 | -                 |
| x-C <sub>27:1</sub>                       | 2674            | -                          | -                          | -                          | -                          | -                          | -                         | 8.41                       | 11.98                      | -                        | -                 | -                 |
| C <sub>27</sub>                           | 2700            | -                          | -                          | -                          | -                          | -                          | -                         | 17.04                      | 13.47                      | 10.15                    | -                 | -                 |
| Squalene                                  | 2828            | -                          | -                          | -                          | 5.73                       | 7.19                       | 5.22                      | -                          | -                          | -                        | -                 | -                 |
| C <sub>29</sub>                           | 2900            | 69.91                      | 70.52                      | 49.65                      | 80.25                      | 78.47                      | 47.05                     | 22.19                      | 15.12                      | 60.71                    | -                 | -                 |
| C <sub>31</sub>                           | 3100            | 21.41                      | 22.48                      | 13.76                      | 10.64                      | 11.94                      | 6.81                      | -                          | -                          | 11.90                    | -                 | -                 |
| x:C <sub>32:1</sub>                       | 3183            | -                          | -                          | -                          | -                          | -                          | -                         | -                          | -                          | -                        | -                 | 8.52              |
| C <sub>32</sub>                           | 3200            | -                          | -                          | -                          | -                          | -                          | -                         | -                          | -                          | -                        | -                 | 5.49              |
| x-C <sub>33:1</sub>                       | 3280            | -                          | -                          | -                          | -                          | -                          | -                         | -                          | -                          | -                        | -                 | 6.27              |
| 17-, 15-, 13-Me-C <sub>33</sub>           | 3334            | -                          | -                          | -                          | -                          | -                          | -                         | -                          | -                          | -                        | 16.70             | 6.00              |
| 15,19-, 13,17-. 9,13-DiMe C <sub>33</sub> | 3356            | -                          | -                          | -                          | -                          | -                          | -                         | -                          | -                          | -                        | 18.60             | -                 |
| x-C <sub>34:2</sub>                       | 3364            | -                          | -                          | -                          | -                          | -                          | -                         | -                          | -                          | -                        | -                 | 10.87             |
| x-C <sub>34:2</sub>                       | 3373            | -                          | -                          | -                          | -                          | -                          | -                         | -                          | -                          | -                        | -                 | 5.10              |
| x-C <sub>33:2</sub>                       | 3462            | -                          | -                          | -                          | -                          | -                          | -                         | -                          | -                          | -                        | -                 | 8.68              |
| 15-, 13-, 11-, 9-Me-C <sub>35</sub>       | 3530            | -                          | -                          | -                          | -                          | -                          | -                         | -                          | -                          | -                        | 7.50              | -                 |
| Unknown triterpen                         | 3536            | -                          | -                          | 18.27                      | -                          | -                          | 11.20                     | -                          | -                          | -                        | -                 | -                 |
| 15,19-, 13,17-DiMe-C <sub>35</sub>        | 3556            | -                          | -                          | -                          | -                          | -                          | -                         | -                          | -                          | -                        | 9.30              | -                 |
| 11,16-DiMe-C <sub>35</sub>                | 3558            | -                          | -                          | -                          | -                          | -                          | -                         | 13.34                      | 12.04                      | -                        | -                 | -                 |
| Unknown                                   | ?               | -                          | -                          | -                          | -                          | -                          | -                         | 5.10                       | 6.62                       | -                        | 6.67              | 5.21              |

**Table S2.** Relative abundance (%) of cuticular compounds of the host plant *Pyrostegia venusta* and lycaenid caterpillars. Only compounds and values above 5% are shown

| Compounds                          | Retention Index | <i>P. venusta</i> (Bud) | <i>P. venusta</i> (Flo) | <i>M. thordesa</i> (last) | <i>P. polibetes</i> (last) | <i>P. polibetes</i> (last) | <i>P. polibetes</i> (last) | <i>P. polibetes</i> (last) | <i>R. marius</i> (last) |
|------------------------------------|-----------------|-------------------------|-------------------------|---------------------------|----------------------------|----------------------------|----------------------------|----------------------------|-------------------------|
| C <sub>23</sub>                    | 2300            | -                       | -                       | -                         | 12.84                      | -                          | 5.56                       | 9.58                       | 12.00                   |
| C <sub>25</sub>                    | 2500            | -                       | -                       | 25.66                     | 18.39                      | 23.53                      | 19.55                      | 11.17                      | 7.06                    |
| C <sub>26</sub>                    | 2600            | -                       | -                       | 6.07                      | -                          | -                          | -                          | -                          | -                       |
| C <sub>27</sub>                    | 2700            | 15.02                   | 20.18                   | 36.09                     | 28.69                      | 27.76                      | 29.67                      | 23.72                      | 12.71                   |
| C <sub>28</sub>                    | 2800            | -                       | -                       | 6.52                      | -                          | -                          | -                          | -                          | -                       |
| Squalene                           | 2828            | -                       | -                       | -                         | -                          | 7.72                       | -                          | 12.50                      | -                       |
| C <sub>29</sub>                    | 2900            | 33.28                   | 48.37                   | 13.03                     | 12.22                      | 13.76                      | 17.50                      | 14.75                      | 20.09                   |
| C <sub>31</sub>                    | 3100            | 23.37                   | 16.81                   | -                         | -                          | -                          | -                          | -                          | 20.66                   |
| C <sub>33</sub>                    | 3300            | 5.16                    | -                       | -                         | -                          | -                          | -                          | -                          | -                       |
| 15,19-, 13,17-DiMe-C <sub>35</sub> | 3556            | -                       | -                       | -                         | 6.70                       | -                          | -                          | -                          | -                       |

**Table S3.** Relative abundance (%) of cuticular compounds of the host plant *Schefflera vinosa* and lycaenid caterpillars. Only compounds and values above 5% are shown

| Compounds                                 | Retention Index | <i>S. vinosa</i> (Bud) | <i>C. hassan</i> (last) | <i>P. polibetes</i> (last) | <i>R. marius</i> (last) |
|-------------------------------------------|-----------------|------------------------|-------------------------|----------------------------|-------------------------|
| Unknown                                   | ?               | 9.80                   | -                       | -                          | -                       |
| C <sub>23</sub>                           | 2300            | -                      | -                       | -                          | 6.67                    |
| x-C <sub>25:1</sub>                       | 2471            | -                      | -                       | -                          | 20.89                   |
| C <sub>25</sub>                           | 2500            | -                      | -                       | -                          | 10.17                   |
| C <sub>27</sub>                           | 2700            | 12.91                  | 25.13                   | 22.60                      | 14.43                   |
| Squalene                                  | 2828            | 7.00                   | 6.09                    | -                          | -                       |
| 2-Me-C <sub>28</sub>                      | 2861            | -                      | 7.80                    | -                          | -                       |
| x-C <sub>29:1</sub>                       | 2873            | -                      | -                       | 8.55                       | -                       |
| Hexacosanol                               | 2899            | 22.00                  | -                       | -                          | -                       |
| C <sub>29</sub>                           | 2900            | -                      | 18.00                   | 22.76                      | 12.39                   |
| C <sub>31</sub>                           | 3100            | -                      | -                       | -                          | 12.39                   |
| Otacosanol                                | 3105            | 13.00                  | -                       | -                          | -                       |
| Branched with 35 C                        | 3326            | -                      | -                       | 7.45                       | -                       |
| 15,19-, 13,17-, 9,13-DiMe-C <sub>33</sub> | 3356            | -                      | -                       | 8.05                       | -                       |
| Unknown triterpen                         | 3361            | 10.84                  | -                       | -                          | -                       |

**Table S4.** One-way ANOSIM comparison between the relative proportions of cuticular hydrocarbons of the profiles of lycaenid caterpillars, host plants and *Camponotus* workers

|              | Caterpillars |        | Ants   |        | Plants |        |
|--------------|--------------|--------|--------|--------|--------|--------|
|              | R            | P      | R      | P      | R      | P      |
| Caterpillars | -            | -      | 1      | 0.0067 | 0.2094 | 0.0329 |
| Ants         | 1            | 0.0067 | -      | -      | 0.6354 | 0.0768 |
| Plants       | 0.2094       | 0.0329 | 0.6354 | 0.0768 | -      | -      |

**Table S5.** One-way ANOSIM comparison between the relative proportions of cuticular hydrocarbons of the profiles of lycaenid caterpillars, host plants and *Camponotus* workers

|                          | Commensal caterpillars |        | Mutualistic caterpillars |        | Ants   |        | Plants   |        |
|--------------------------|------------------------|--------|--------------------------|--------|--------|--------|----------|--------|
|                          | R                      | P      | R                        | P      | R      | P      | R        | P      |
| Commensal caterpillars   | -                      | -      | 0.744                    | 0.0048 | 1      | 0.0924 | -0.08642 | 0.5548 |
| Mutualistic caterpillars | 0.744                  | 0.0048 | -                        | -      | 1      | 0.0101 | 0.5535   | 0.0007 |
| Ants                     | 1                      | 0.0924 | 1                        | 0.0101 | -      | -      | 0.6354   | 0.068  |
| Plants                   | -0.08642               | 0.5548 | 0.5535                   | 0.0007 | 0.6354 | 0.068  | -        | -      |
